# Supplementary material
Source: publisher figshare collection journal article supplement (https://gsajournals.figshare.com/ndownloader/files/17768249)
Supplement: Supplementary file 1 [file 17768249]

……….. T6F

tgcctttgtggctgagtcttcctggagtcagtggatcgcaggcagcctgaggcatcagccttcggatttctaagcctaggagtcattcggggctgcagaagaggacctagctcctaactagcttcagatgctagctctgaaaaactcttcaacactgttcttgtaaacaaagatccagagttaggtgttggcg ___T4R

**Supplemental text.** The full sequence of Auts2 isoform, T6, using specific primers, T6F and T4R.
